# Supplementary material for: Riverine Inputs Impact the Diversity and Population Structure of Heterotrophic Fungus-like Protists and Bacterioplankton in the Coastal Waters of the South China Sea
Source: MDPI journal article supplement (doi:10.3390/w14101580), 2022-05-15
Supplement: s1 [file s1]

## Supplementary Information

# Riverine Inputs Impact the Diversity and Population Structure of Heterotrophic Fungus-Like Protists and Bacterioplankton in the Coastal Waters of the South China Sea

Suisui Wang <sup>1</sup>, Kalyani Sen <sup>1</sup>, Yaodong He <sup>1</sup>, Mohan Bai <sup>2,\*</sup> and Guangyi Wang <sup>1,3,4,\*</sup>

<sup>1</sup> Center for Marine Environmental Ecology, School of Environmental Science and Engineering, Tianjin University, Tianjin 300072, China; wss960128@tju.edu.cn (S.W.); ksen@tju.edu.cn (K.S.); yaodong.he@tju.edu.cn (Y.H.)

<sup>2</sup> College of Life Sciences, Zhejiang University, Hangzhou 310058, China

<sup>3</sup> Key Laboratory of Systems Bioengineering (Ministry of Education), Tianjin University, Tianjin 300072, China

<sup>4</sup> Center for Biosafety Research and Strategy, Tianjin University, Tianjin 300072, China

**Keywords:** thraustochytrids; diversity; salinity gradient; DNA sequencing

Table S1 Sampling stations and environmental parameters

| Station | Habitat  | Cruise | Temperature(°C) | Salinity(‰) |
|---------|----------|--------|-----------------|-------------|
| P1      | Plume    | 2016   | 28.62           | 31.72       |
| P2      | Plume    | 2016   | 28.31           | 32.50       |
| C1      | Offshore | 2016   | 28.76           | 33.52       |
| C2      | Offshore | 2016   | 27.52           | 34.70       |
| C3      | Offshore | 2016   | 28.93           | 34.41       |
| C4      | Offshore | 2016   | 28.88           | 33.39       |
| O1      | Pelagic  | 2016   | 29.29           | 34.58       |
| O2      | Pelagic  | 2016   | 29.29           | 34.11       |
| P1      | Plume    | 2018   | 28.81           | 32.20       |
| P2      | Plume    | 2018   | 28.91           | 31.79       |
| P3      | Plume    | 2018   | 28.81           | 32.18       |
| C1      | Offshore | 2018   | 28.56           | 33.51       |
| C2      | Offshore | 2018   | 28.69           | 34.30       |
| C3      | Offshore | 2018   | 29.17           | 34.01       |
| C4      | Offshore | 2018   | 29.29           | 33.65       |
| O3      | Pelagic  | 2018   | 29.22           | 33.78       |
| O4      | Pelagic  | 2018   | 28.99           | 33.71       |

Table S2 Sampling stations for LP and bacterioplankton diversity

| Cruise | LP                                    | Bacterioplankton          |
|--------|---------------------------------------|---------------------------|
| 2016   | P1, P2, C1, C2, C3,<br>C4, O1, O2     | P1, P2, C1, C2,<br>O1, O2 |
| 2018   | P1, P2, P3, C1, C2,<br>C3, C4, O3, O4 | P1, P2, C1, C2,<br>O3, O4 |

Table S3 Pairwise comparisons for bacterioplankton composition using permutation MANOVA.

|          | Plume | Offshore | Pelagic |
|----------|-------|----------|---------|
| Plume    | -     | 0.016    | 0.016   |
| Offshore | 0.016 | -        | 0.028   |
| Pelagic  | 0.016 | 0.028    | -       |

Table S4 Pairwise comparisons for LP composition using permutation MANOVA.

|          | Plume | Offshore | Pelagic |
|----------|-------|----------|---------|
| Plume    | -     | 0.006    | 0.013   |
| Offshore | 0.006 | -        | 0.225   |
| Pelagic  | 0.013 | 0.225    | -       |
